# Supplementary material for: The RNA-binding protein Mex3B is a coreceptor of Toll-like receptor 3 in innate antiviral response
Source: PubMed Central journal article supplement — Cell Res. 2016 Jan 29;26(3):288–303. doi: 10.1038/cr.2016.16 (PMC4783467; doi:10.1038/cr.2016.16), 2016-01-29
Supplement: cr201616x1.pdf [file cr201616x1.pdf]

293-TLR3  
IFN- $\beta$

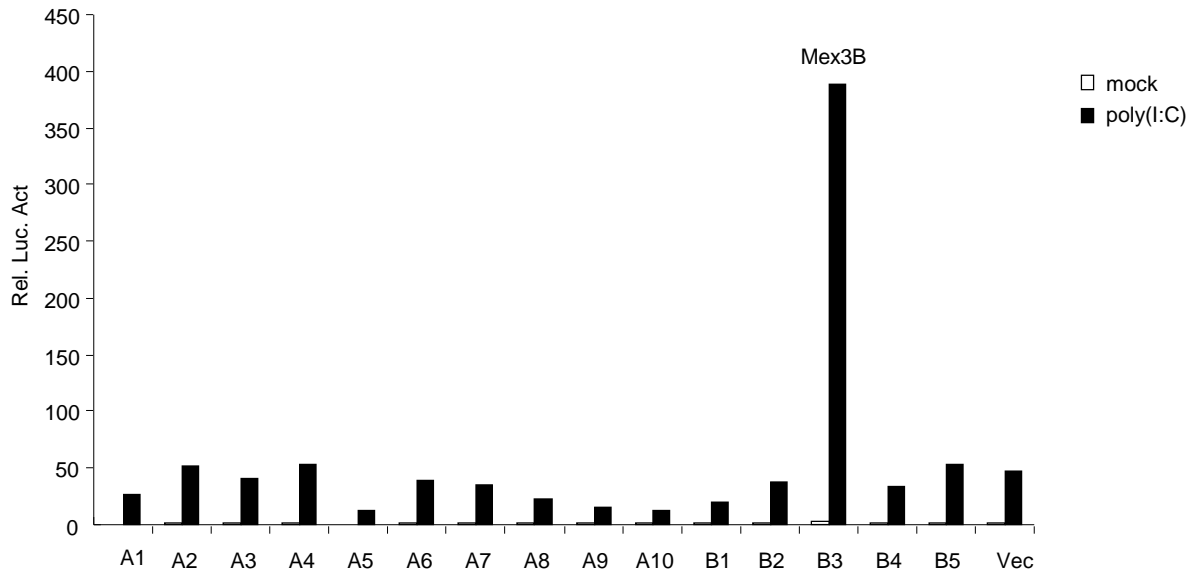

**Figure S1.** Identification of Mex3B by expression cloning screens.

The 293-TLR3 cells ( $1 \times 10^5$ ) were transfected with the indicated expression plasmids ( $0.05 \mu\text{g}$ ) and the IFN- $\beta$  promoter reporter plasmid ( $0.1 \mu\text{g}$ ). Twenty hours after transfection, cells were left untreated or treated with poly(I:C) ( $20 \mu\text{g/ml}$ ) for 6 hours before luciferase assays were performed. An example of the screening data is shown.
