# Supplementary material for: The RNA-binding protein Mex3B is a coreceptor of Toll-like receptor 3 in innate antiviral response
Source: PubMed Central journal article supplement — Cell Res. 2016 Jan 29;26(3):288–303. doi: 10.1038/cr.2016.16 (PMC4783467; doi:10.1038/cr.2016.16), 2016-01-29
Supplement: cr201616x2.pdf [file cr201616x2.pdf]

**A**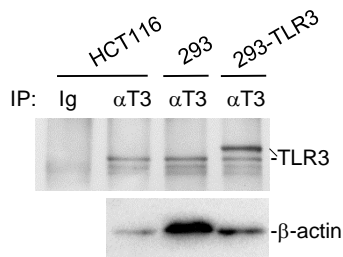**B**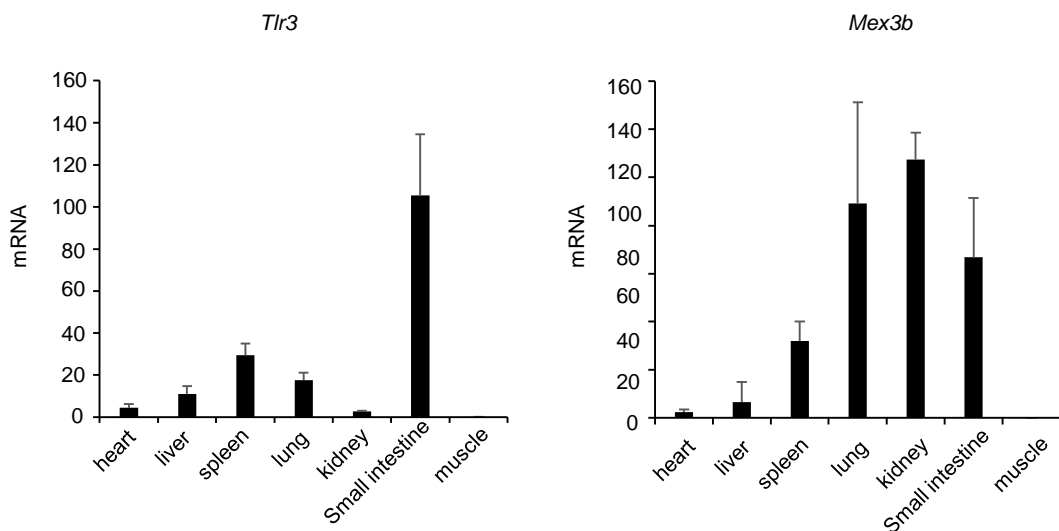

**Figure S2.** Expression profile of TLR3 in various cell lines and mouse tissues.

(A) Expression of Mex3B in 293, 293-TLR3 and HCT116 cells. The 293 ( $5 \times 10^6$ ), 293-TLR3 ( $2 \times 10^6$ ) and HCT116 ( $1 \times 10^6$ ) cells were lysed and analyzed by immunoprecipitation and immunoblots with the indicated antibodies.

(B) Levels of *Mex3b* and *Tlr3* mRNA in various mouse tissues. Total RNAs were extracted from the indicated mouse tissues and reverse-transcribed into cDNAs before qPCR experiments were performed. The expression level of GAPDH was used as the internal control.
