# Supplementary material for: The RNA-binding protein Mex3B is a coreceptor of Toll-like receptor 3 in innate antiviral response
Source: PubMed Central journal article supplement — Cell Res. 2016 Jan 29;26(3):288–303. doi: 10.1038/cr.2016.16 (PMC4783467; doi:10.1038/cr.2016.16), 2016-01-29
Supplement: cr201616x3.pdf [file cr201616x3.pdf]

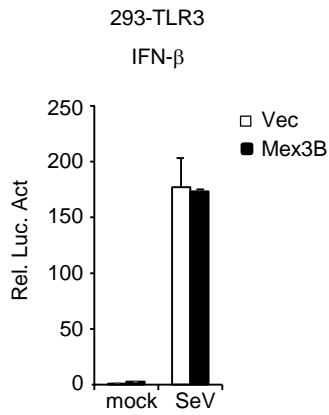

**Figure S3.** Overexpression of Mex3B has no effects on SeV-induced activation of the IFN- $\beta$  promoter in 293-TLR3 cells.

The 293-TLR3 ( $1 \times 10^5$ ) cells were transfected with the indicated plasmids ( $0.1 \mu\text{g}$ ). Twenty-four hours after transfection, cells were infected with SeV for 12 hours before luciferase assays were performed.
