# Supplementary material for: The RNA-binding protein Mex3B is a coreceptor of Toll-like receptor 3 in innate antiviral response
Source: PubMed Central journal article supplement — Cell Res. 2016 Jan 29;26(3):288–303. doi: 10.1038/cr.2016.16 (PMC4783467; doi:10.1038/cr.2016.16), 2016-01-29
Supplement: cr201616x4.pdf [file cr201616x4.pdf]

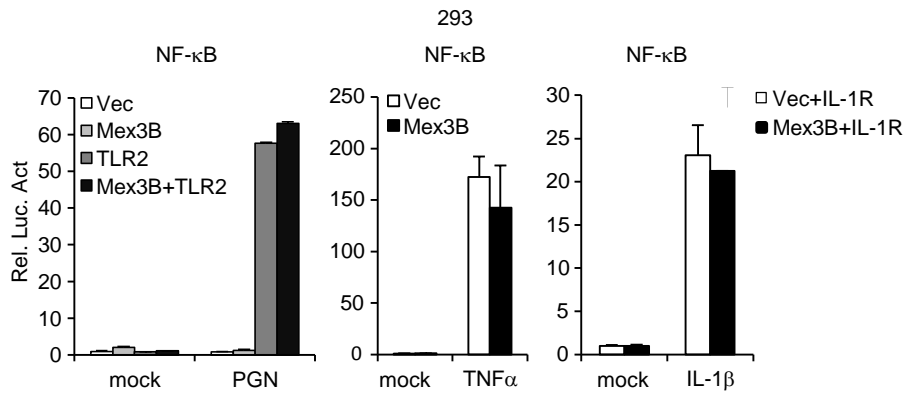

**Figure S4.** Overexpression of Mex3B has no marked effects on PGN-, TNF $\alpha$ -, or IL-1 $\beta$ -induced activation of NF- $\kappa$ B.

The 293 cells ( $1 \times 10^5$ ) were transfected with NF- $\kappa$ B reporter (0.1  $\mu$ g) and the indicated expression plasmids (0.1  $\mu$ g). Twenty hours after transfection, cells were left untreated, treated with PGN (10  $\mu$ g/ml), TNF $\alpha$  (10 ng/ml), or IL-1 $\beta$  (10 ng/ml) for 6 hours before luciferase assays were performed.
