# Supplementary material for: The RNA-binding protein Mex3B is a coreceptor of Toll-like receptor 3 in innate antiviral response
Source: PubMed Central journal article supplement — Cell Res. 2016 Jan 29;26(3):288–303. doi: 10.1038/cr.2016.16 (PMC4783467; doi:10.1038/cr.2016.16), 2016-01-29
Supplement: cr201616x5.pdf [file cr201616x5.pdf]

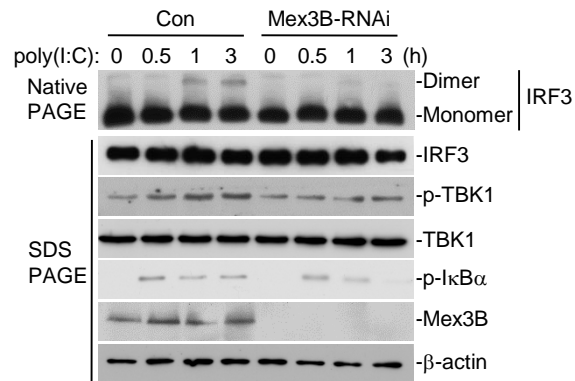

**Figure S5.** Effects of Mex3B-RNAi on poly(I:C)-induced activation IRF3 and phosphorylation of TBK1 and IκBα.

The 293-TLR3 cells ( $2 \times 10^5$ ) were transfected with a control or Mex3B-RNAi plasmid (1 μg). Twenty hours after transfection, cells were left untreated or treated with poly(I:C) for the indicated times. Cell lysates were separated by native- or SDS-PAGE and analyzed with the indicated antibodies.
