# Supplementary material for: The RNA-binding protein Mex3B is a coreceptor of Toll-like receptor 3 in innate antiviral response
Source: PubMed Central journal article supplement — Cell Res. 2016 Jan 29;26(3):288–303. doi: 10.1038/cr.2016.16 (PMC4783467; doi:10.1038/cr.2016.16), 2016-01-29
Supplement: cr201616x6.pdf [file cr201616x6.pdf]

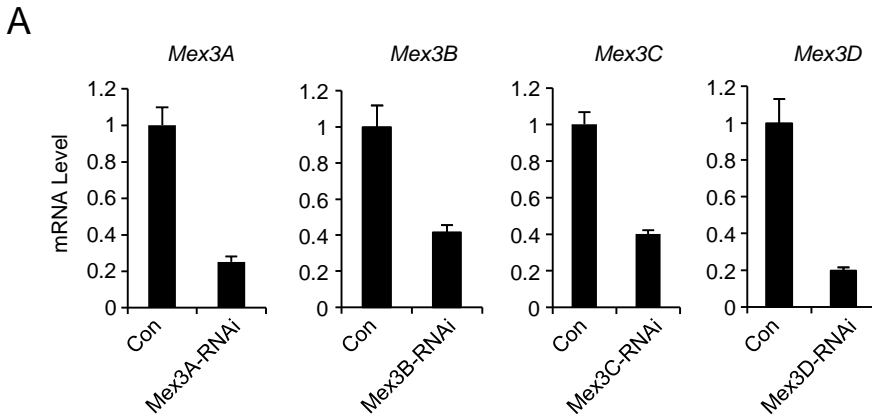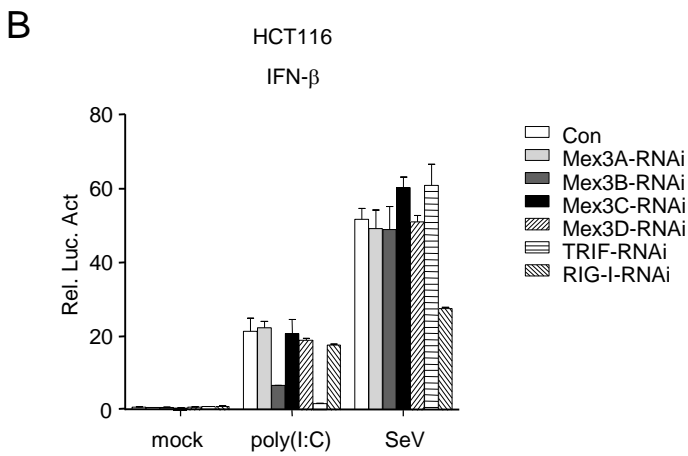

**Figure S6.** Effects of knockdown of Mex3s on various signaling pathways.

(A) Effects of the Mex3-RNAi plasmids on expression of Mex3s. The 293 cells ( $2 \times 10^5$ ) were transfected with a control or the indicated Mex3-RNAi plasmid ( $1 \mu\text{g}$ ). qPCR experiments were performed 24 hours after transfection.

(B) Effects of Mex3-RNAi on poly(I:C)- and SeV-induced activation of the IFN- $\beta$  promoter in HCT116 cells. Cells ( $1 \times 10^5$ ) were transfected with the IFN- $\beta$  promoter reporter ( $0.1 \mu\text{g}$ ) plus a control or the indicated Mex3-RNAi plasmid ( $0.5 \mu\text{g}$ ). Twenty hours after transfection, cells were left untreated, infected with SeV for 12 hours, or treated with poly(I:C) for 6 hours before luciferase assays were performed.
