# Supplementary material for: The RNA-binding protein Mex3B is a coreceptor of Toll-like receptor 3 in innate antiviral response
Source: PubMed Central journal article supplement — Cell Res. 2016 Jan 29;26(3):288–303. doi: 10.1038/cr.2016.16 (PMC4783467; doi:10.1038/cr.2016.16), 2016-01-29
Supplement: cr201616x7.pdf [file cr201616x7.pdf]

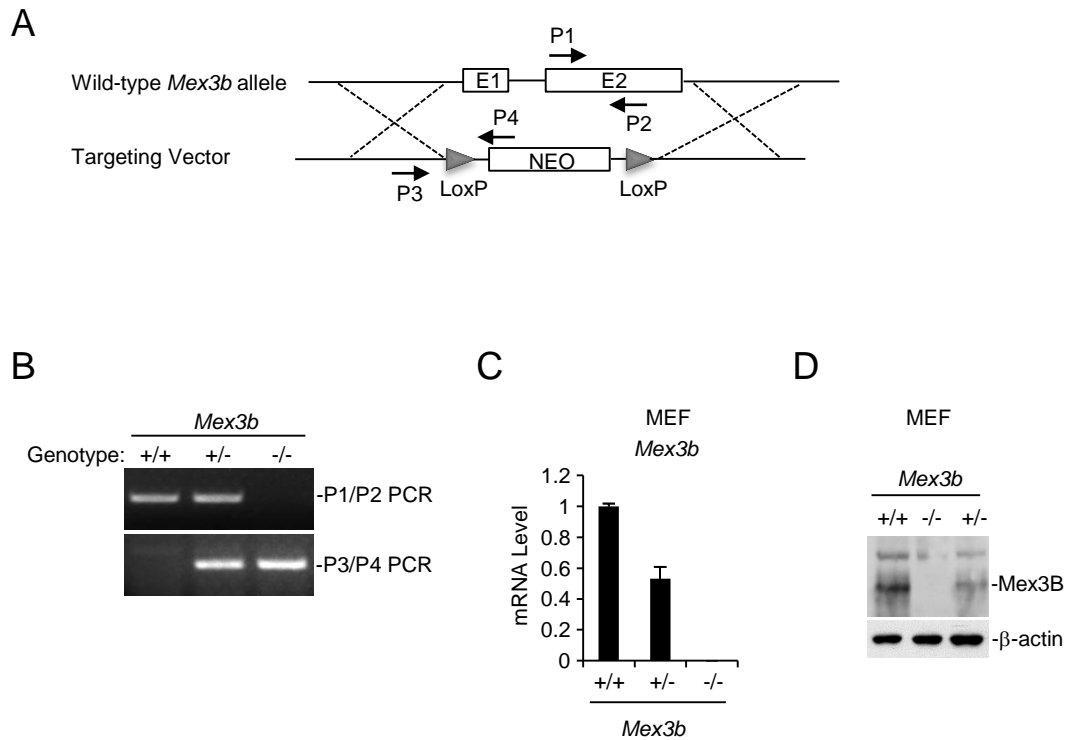

**Figure S7.** Generation of *Mex3b*<sup>-/-</sup> mice.

(A) *Mex3b* targeting strategy. The exon 1 and 2 of *Mex3b* gene were deleted by homologous recombination.

(B) PCR analysis of genomic DNA to identify wild-type, heterozygous and *Mex3b*<sup>-/-</sup> mice.

(C) mRNA level of *Mex3b* in wild-type, heterozygous and *Mex3b*<sup>-/-</sup> MEFs.

(D) Expression of *Mex3b* in wild-type, heterozygous and *Mex3b*<sup>-/-</sup> MEFs.
