# Supplementary material for: The RNA-binding protein Mex3B is a coreceptor of Toll-like receptor 3 in innate antiviral response
Source: PubMed Central journal article supplement — Cell Res. 2016 Jan 29;26(3):288–303. doi: 10.1038/cr.2016.16 (PMC4783467; doi:10.1038/cr.2016.16), 2016-01-29
Supplement: cr201616x8.pdf [file cr201616x8.pdf]

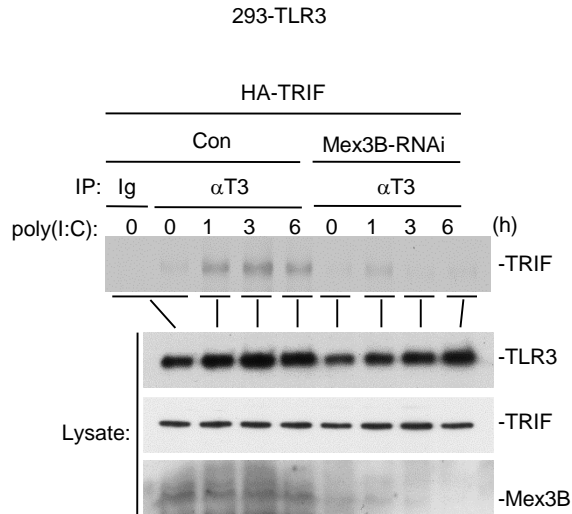

**Figure S8.** Knockdown of Mex3B impairs recruitment of TRIF to TLR3.

The 293-TLR3 cells ( $2 \times 10^6$ ) stably transduced with control or Mex3B-RNAi were transfected with TRIF expression plasmid ( $5 \mu\text{g}$ ). Twenty-four hours after transfection, cells were treated with poly(I:C) ( $20 \mu\text{g/ml}$ ) for the indicated times. Coimmunoprecipitation and immunoblots were performed with the indicated antibodies.
