# Supplementary material for: The RNA-binding protein Mex3B is a coreceptor of Toll-like receptor 3 in innate antiviral response
Source: PubMed Central journal article supplement — Cell Res. 2016 Jan 29;26(3):288–303. doi: 10.1038/cr.2016.16 (PMC4783467; doi:10.1038/cr.2016.16), 2016-01-29
Supplement: cr201616x9.pdf [file cr201616x9.pdf]

**A**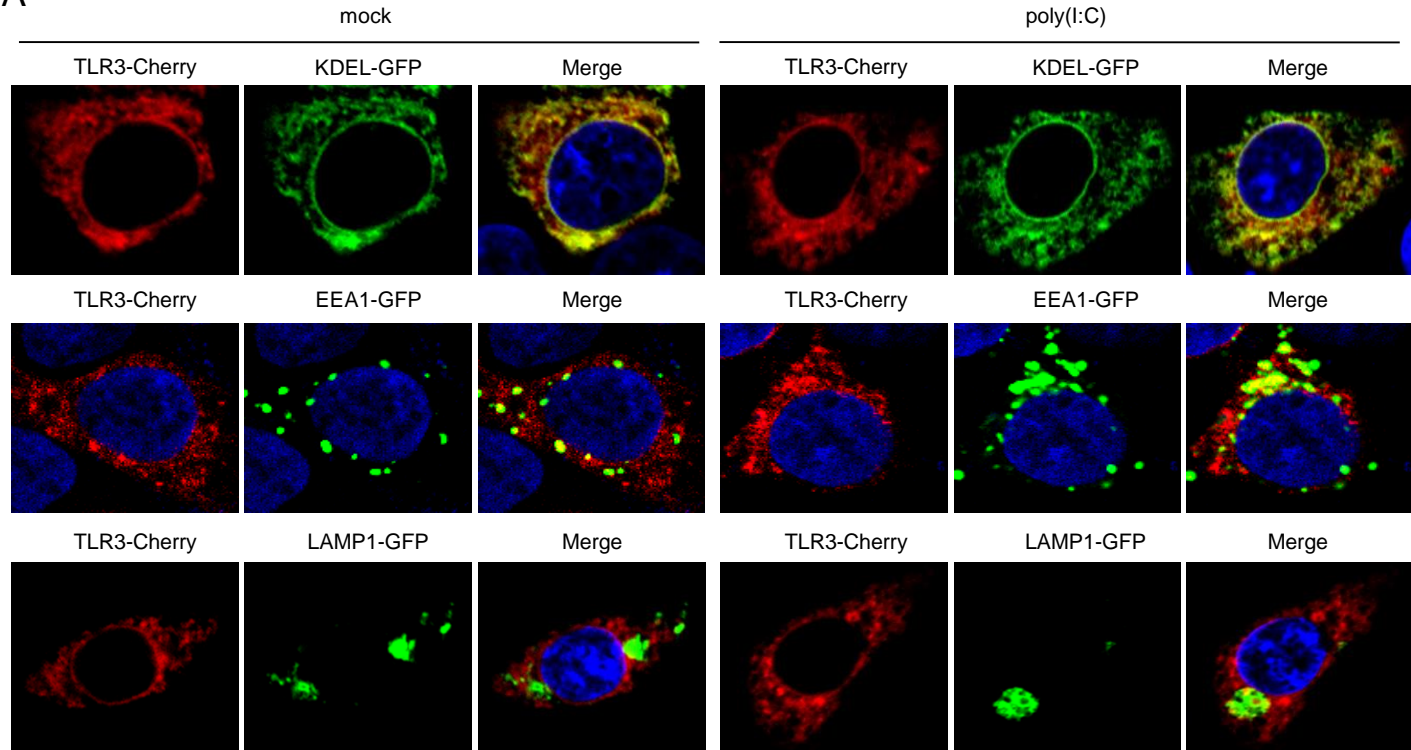**B**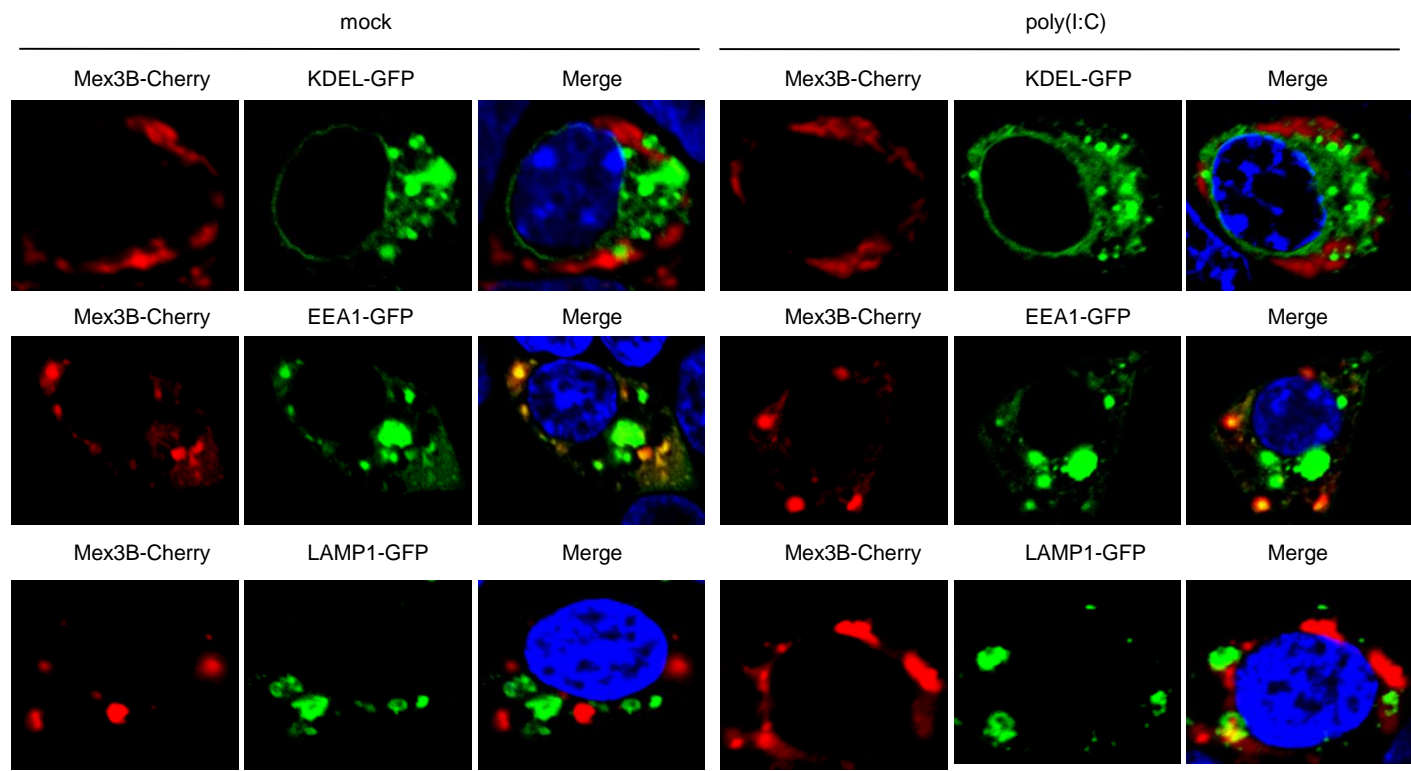

**Figure S9.** Cellular localization of TLR3 and Mex3B.

(A&B) The 293 cells ( $1 \times 10^5$ ) were transfected with TLR3-cherry (A) or Mex3B-cherry (B) ( $0.1 \mu\text{g}$ ), plus either KDEL-GFP (ER marker), EEA1-GFP (early endosome marker) or LAMP-1-GFP (lysosome marker) ( $0.1 \mu\text{g}$ ). Twenty hours after transfection, cells were left untreated or treated with poly(I:C) for 0.5 hours. Cells were then fixed with 4% paraformaldehyde, stained with DAPI ( $2 \mu\text{g/ml}$ ), and subjected to confocal microscopy.
