# Supplementary material for: The RNA-binding protein Mex3B is a coreceptor of Toll-like receptor 3 in innate antiviral response
Source: PubMed Central journal article supplement — Cell Res. 2016 Jan 29;26(3):288–303. doi: 10.1038/cr.2016.16 (PMC4783467; doi:10.1038/cr.2016.16), 2016-01-29
Supplement: cr201616x10.pdf [file cr201616x10.pdf]

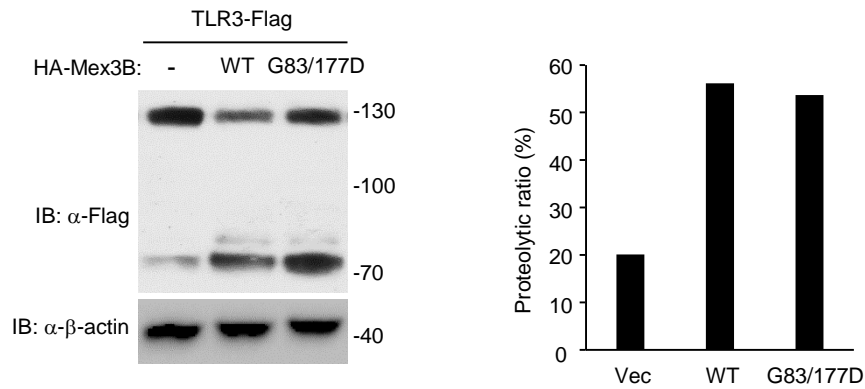

**Figure S10.** Mex3B(G83/177D) promotes the processing of TLR3 as efficient as the wild type Mex3B. The 293 cells ( $2 \times 10^5$ ) were transfected with the indicated plasmids ( $0.5 \mu\text{g}$ ). Twenty-four hours after transfection, immunoblots were performed. The relative amount of full-length TLR3, processed fragments of TLR3 and total TLR3 was quantitated by the Bio-Rad Quantity One program, and the proteolytic ratio was shown.
