# Supplementary material for: The RNA-binding protein Mex3B is a coreceptor of Toll-like receptor 3 in innate antiviral response
Source: PubMed Central journal article supplement — Cell Res. 2016 Jan 29;26(3):288–303. doi: 10.1038/cr.2016.16 (PMC4783467; doi:10.1038/cr.2016.16), 2016-01-29
Supplement: cr201616x11.pdf [file cr201616x11.pdf]

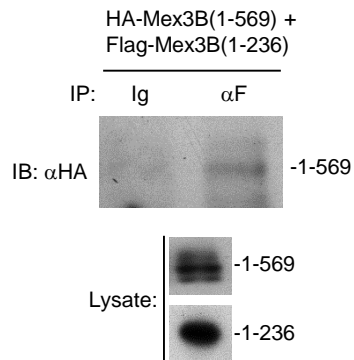

**Figure S11.** Mex3B(1-236) associates with the full-length Mex3B.

The 293-TLR3 cells ( $2 \times 10^6$ ) were transfected with the indicated Mex3B expression plasmids (5  $\mu$ g).

Coimmunoprecipitation and immunoblots were performed with the indicated antibodies.
